# Supplementary material for: Phenolic Content and Antioxidant Activity in Seeds of Common Bean (Phaseolus vulgaris L.)
Source: Foods. 2021 Apr 15;10(4):864. doi: 10.3390/foods10040864 (PMC8071416; doi:10.3390/foods10040864)
Supplement: Supplementary file 1 [file foods-10-00864-s001.zip]

Archive with 6 entries (6 files):
- Supplementary Figures 1.pdf
- Supplementary Figures 2.pdf
- Supplementary Figures 3.pdf
- Supplementary Figures 4.pdf
- Supplementary Figures 5.pdf
- Supplementary Table 1.xls
