# Supplementary material for: Phenolic Content and Antioxidant Activity in Seeds of Common Bean (Phaseolus vulgaris L.)
Source: Foods. 2021 Apr 15;10(4):864. doi: 10.3390/foods10040864 (PMC8071416; doi:10.3390/foods10040864)
Supplement: Supplementary file 1 [file foods-10-00864-s001.zip › Supplementary Table 1.xls]

## Sheet: Sup Table 1
SDP code	Main color	Seed number colors	Gene Pool	TPC (μg GAE/g)	TFC (μg CE/g)	MAC (μg C3G/g)	FRAP (μmol Fe(II)/g)	DPPH (μmol TE/g)	PAOXI	Cluster group	Phenolic and antioxidant power
SDP001	Brown	2	mesoamerican	2473.82	1087.03	0	26.28	14.42	15.68	2	MPA
SDP002	White	1	admixture	644.65	91.12	0	6.2	0.97	4.05	1	LPA
SDP004	White	1	admixture	710.57	144.81	0	6.67	1.54	5.82	1	LPA
SDP005	Red	1	mesoamerican	2367.54	983.24	34.51	22.56	11.88	13.5	2	MPA
SDP006	White	1	admixture	652.52	99.01	0	8.13	1.11	4.59	1	LPA
SDP007	Cream	1	admixture	2134.1	979.43	0	34.57	15.62	19.7	2	MPA
SDP008	Cream	2	andean	3153.03	1544.08	61.76	56.7	33.23	28.35	3	HPA
SDP009	White	1	admixture	611.92	113.28	0	4.85	1.23	5.43	1	LPA
SDP011	Black	1	andean	2824.6	1142.62	452.07	47.84	19.9	18.95	3	MPA
SDP012	Brown	1	mesoamerican	2192.95	987.79	0	24.06	12.44	15.27	2	MPA
SDP013	White	1	mesoamerican	483.97	105.39	0	4.96	0.99	5.48	1	LPA
SDP014	White	1	admixture	472	106.97	0	5.74	0.93	5.31	1	LPA
SDP015	White	1	mesoamerican	693.23	123.61	0	5.74	1.3	5.04	1	LPA
SDP016	Black	1	admixture	2097.72	477.71	330.15	29.39	9.63	12.34	2	MPA
SDP017	White speckled	3	andean	896.45	382.11	0	10.3	3.33	10	1	LPA
SDP018	Yellow	1	admixture	820.39	112.16	0	7.39	1.55	5.09	1	LPA
SDP019	White speckled	3	andean	993.61	350.19	0	10.34	3.53	9.55	1	LPA
SDP020	Brown	1	admixture	3281.67	1647.3	0	28.74	26.96	22.1	3	MPA
SDP021	Cream	1	andean	1727.33	879.12	0	23.38	10.83	16.87	2	MPA
SDP022	White	1	andean	604.06	125.52	0	7.59	1.19	5.31	1	LPA
SDP023	Cream	2	andean	2509.4	1206.8	0	31.26	15.89	17.03	2	MPA
SDP024	Brown	1	mesoamerican	2219.86	1242.81	0	27.78	14.6	17.69	2	MPA
SDP025	Brown	1	admixture	2187.81	979.85	0	23.94	11.56	14.21	2	MPA
SDP026	Yellow	1	andean	1235.6	480.26	0	13.6	6	13.07	1	LPA
SDP027	Brown	1	admixture	2233.77	1169.31	0	26.93	14.21	17.12	2	MPA
SDP028	Cream	1	andean	1828.71	984.65	0	24.73	12.03	17.7	2	MPA
SDP029	Grey	3	mesoamerican	1475.99	490.93	0	21.5	8.69	15.84	2	MPA
SDP030	White	1	andean	770.67	98.79	0	6.44	1.04	3.63	1	LPA
SDP031	White	1	mesoamerican	562.32	87.96	0	10.01	1.07	5.13	1	LPA
SDP032	Yellow	1	andean	2277.11	986.97	0	24.97	13.26	15.67	2	MPA
SDP033	White	1	mesoamerican	537.69	108.55	0	6.59	1.12	5.58	1	LPA
SDP034	White speckled	3	andean	2035.12	993.32	51.52	26.83	12.96	17.13	2	MPA
SDP035	Brown	1	admixture	2072.86	931.05	0	25.31	14.71	19.09	2	MPA
SDP036	White speckled	3	andean	896.68	408.11	13.57	7.28	3.24	9.72	1	LPA
SDP037	Red	2	andean	3004.78	1769.02	86.26	31.84	19.97	17.88	2	MPA
SDP038	Red	1	andean	2337.2	1042.67	144.81	31.44	15.62	17.98	2	MPA
SDP040	Cream	1	mesoamerican	2469.49	1286.51	0	27.19	16.67	18.16	2	MPA
SDP042	Grey	1	mesoamerican	663.24	140.98	0	6.24	1.42	5.75	1	LPA
SDP043	Yellow	1	andean	1007.64	121.18	0	6.68	1.47	3.92	1	LPA
SDP044	Pink	1	andean	2490.13	1065.51	0	32.3	15.74	17.01	2	MPA
SDP045	Pink	1	andean	2883.67	1388.56	0	42.5	16.95	15.81	3	MPA
SDP047	Pink	1	andean	3067.5	1434.41	0	31.31	17.27	15.14	2	MPA
SDP048	White	1	andean	534.61	102.57	0	5.99	0.88	4.44	1	LPA
SDP049	Black	1	andean	2203.55	774.56	168.68	32.42	13.49	16.46	2	MPA
SDP051	Cream	1	mesoamerican	2170.94	825.32	0	24.72	14.44	17.9	2	MPA
SDP052	White	1	andean	545.21	99.3	0	4.69	0.87	4.3	1	LPA
SDP053	Cream	1	andean	2629.71	1303.56	0	27.72	16.33	16.7	2	MPA
SDP054	Pink	1	mesoamerican	1590.37	642.07	0	25.06	11.32	19.15	2	MPA
SDP055	Brown	1	mesoamerican	1785.37	688.09	0	25.82	13.68	20.62	2	MPA
SDP056	White	1	andean	678.07	93.82	0	5.79	1.32	5.25	1	LPA
SDP057	Grey	1	andean	1110.5	432.33	0	12.94	6.09	14.77	1	LPA
SDP058	White	1	andean	681.26	111.25	0	10.19	1.85	7.32	1	LPA
SDP059	Black	1	andean	2992.81	1097.96	248.35	51.48	22.86	20.55	3	HPA
SDP061	Cream	1	andean	3893.71	2196.97	0	47.55	27.81	19.22	3	HPA
SDP063	Cream	1	andean	2118.02	667.64	0	17.32	10.47	13.3	2	MPA
SDP064	Cream	1	andean	2399.58	961.39	0	22.42	12.2	13.67	2	MPA
SDP065	White	1	andean	656.29	112.78	0	5.75	1.02	4.19	1	LPA
SDP066	White	1	andean	559.7	88.63	0	4.34	0.86	4.13	1	LPA
SDP067	Red	1	andean	2216.78	919.92	150.91	15.9	15.95	19.36	2	MPA
SDP068	White	1	mesoamerican	491.04	91.51	0	5.49	0.9	4.93	1	LPA
SDP069	White	1	andean	743.64	130.09	0	7.72	1.12	4.03	1	LPA
SDP070	Brown	1	admixture	2523.54	983.33	0	29.62	16.2	17.27	2	MPA
SDP071	Cream	2	andean	1715.81	646.03	34.11	27.62	11.02	17.28	2	MPA
SDP072	Yellow	1	andean	2314.51	827.39	0	30.16	12.17	14.15	2	MPA
SDP073	Cream	1	andean	2441.09	1140.25	0	29.87	16.58	18.27	2	MPA
SDP074	Cream	2	andean	2518.41	1383.51	0	34.51	17.19	18.37	2	MPA
SDP075	Yellow	1	andean	2660.73	1325.41	0	29.6	17.86	18.06	2	MPA
SDP076	Brown	1	andean	1372.9	526.68	0	9.89	7.61	14.91	1	LPA
SDP077	Cream	1	andean	2835.55	1448.32	0	37.06	20.32	19.28	3	HPA
SDP078	Yellow	1	admixture	705.21	98.22	0	5.06	0.97	3.7	1	LPA
SDP079	Cream	1	andean	1822.67	492.67	0	15.99	7.72	11.4	2	MPA
SDP080	White	1	mesoamerican	641.69	105.16	0	7.15	1.44	6.03	1	LPA
SDP081	Yellow	1	admixture	1178.81	125.69	0	8.37	2.21	5.04	1	LPA
SDP082	White	1	mesoamerican	546.12	105.33	0	5.01	1.39	6.87	1	LPA
SDP083	Pink	1	andean	3683.19	1764.17	0	43.52	31.76	23.2	3	HPA
SDP084	Cream	2	andean	1574.4	522.34	0	19.79	8.78	15.01	2	MPA
SDP085	Cream	1	andean	2562.66	836.58	0	24.74	10.1	10.6	2	MPA
SDP086	Pink	1	andean	2994.4	1449.73	0	22.74	16.97	15.24	2	MPA
SDP087	White	1	admixture	604.28	92.58	0	6.07	1.08	4.82	1	LPA
SDP089	White	1	mesoamerican	542.25	116.67	0	5.17	1.1	5.44	1	LPA
SDP090	White speckled	3	andean	1064.88	451.1	0	11.58	3.65	9.22	1	LPA
SDP091	Cream	1	andean	2526.96	1540.8	0	33.67	18.02	19.18	2	MPA
SDP092	Red	2	andean	2892.45	1880.46	88.17	44.92	24.69	22.96	3	HPA
SDP093	Cream	1	admixture	1641.69	900.03	0	22.34	10.87	17.81	2	MPA
SDP094	Cream	2	mesoamerican	2369.02	1068.83	0	24.17	15.46	17.55	2	MPA
SDP095	Cream	2	mesoamerican	2458.65	1197.73	0	29.77	21.07	23.06	2	MPA
SDP097	Black	1	mesoamerican	3617.74	1193.45	1622.51	72.93	25.9	19.26	3	HPA
SDP098	Black	1	andean	2425.13	1309.34	283.03	38.16	18.19	20.18	2	MPA
SDP100	White	1	andean	549.2	117.85	0	5.54	1.01	4.95	1	LPA
SDP101	White	1	andean	656.17	122.08	0	7.34	1.4	5.74	1	LPA
SDP102	Red	1	andean	3143.91	1561.3	216.55	47.27	27.31	23.36	3	HPA
SDP103	White speckled	2	andean	1422.85	585.74	59.67	16.56	7.35	13.9	1	MPA
SDP104	Cream	1	andean	2221.57	534.58	0	19.88	11.23	13.6	2	MPA
SDP105	Brown	1	admixture	2521.6	1069.4	28.45	29.69	13.73	14.65	2	MPA
SDP106	Black	1	admixture	2599.15	915.04	470.86	45.52	19.7	20.39	3	MPA
SDP107	Brown	1	mesoamerican	1702.13	882.6	0	21.95	10.91	17.24	2	MPA
SDP108	Cream	3	andean	2362.52	1140.25	0	29.39	15.46	17.6	2	MPA
SDP109	Red	1	andean	1934.99	1117.54	109.86	33.43	12.53	17.42	2	MPA
SDP110	Cream	3	admixture	2160.56	1043.42	0	27.4	14.66	18.25	2	MPA
SDP111	Pink	1	andean	2304.25	921.25	0	22.24	11.68	13.63	2	MPA
SDP112	Pink	1	mesoamerican	2281.21	928.45	0	25.38	12.18	14.37	2	MPA
SDP113	Black	1	andean	2270.38	769.2	215.17	40.31	16.32	19.34	2	MPA
SDP114	Brown	2	andean	2131.37	700.26	107.59	33.63	14.35	18.11	2	MPA
SDP115	White	1	mesoamerican	591.28	102	0	5.77	1.18	5.39	1	LPA
SDP116	Black	1	admixture	2015.05	735.06	133.64	25.86	13.29	17.75	2	MPA
SDP117	Yellow	1	andean	1008.32	112.72	0	6.78	1.75	4.68	1	LPA
SDP118	Yellow	1	andean	2767.81	1569.12	0	32.57	19.98	19.42	2	MPA
SDP119	Black	1	andean	2395.36	1272.76	381	42.57	17.75	19.93	2	MPA
SDP120	Red	2	andean	2444.06	1161.18	139.65	25.07	14.67	16.14	2	MPA
SDP121	Cream	2	andean	2858.02	1887.74	0	42.65	22.77	21.43	3	HPA
SDP122	Red	1	andean	2371.19	1218.14	116.09	28.84	14.99	17.01	2	MPA
SDP123	White	1	admixture	547.61	95.35	0	4.89	1.03	5.05	1	LPA
SDP124	Black	1	andean	3688.67	1790.87	364.08	47.7	24.7	18.02	3	HPA
SDP126	Brown	1	admixture	2097.04	1260.29	0	26.7	14.98	19.22	2	MPA
SDP127	Brown	1	andean	2596.41	1945.12	0	38.45	22.59	23.4	3	HPA
SDP128	Brown	1	mesoamerican	1614.66	479.35	0	14.82	6.75	11.25	1	LPA
SDP129	Brown	1	mesoamerican	1839.77	750.17	0	20.67	9.45	13.82	2	MPA
SDP130	Pink	1	mesoamerican	1797.35	683.95	23.24	18.54	8.54	12.79	2	MPA
SDP131	Pink	2	andean	2449.65	1220.13	0	27.11	15.68	17.22	2	MPA
SDP132	Red	1	andean	2473.59	1223.69	169.22	30.08	16.51	17.96	2	MPA
SDP133	White	1	mesoamerican	462.31	114.92	0	6.1	1.1	6.39	1	LPA
SDP134	Cream	1	andean	2266.39	1199.77	0	28.93	16.43	19.5	2	MPA
SDP135	Yellow	1	andean	950.62	155.81	0	8.18	1.74	4.93	1	LPA
SDP136	Cream	1	andean	2445.88	1167.9	0	30.79	17	18.7	2	MPA
SDP137	Grey	3	andean	2746.37	1333.52	0	32.27	17.8	17.43	2	MPA
SDP138	Brown	1	andean	2365.49	1126.52	0	31.1	16.24	18.47	2	MPA
SDP139	White	1	admixture	552.74	108.09	0	5.29	1.12	5.44	1	LPA
SDP140	Pink	1	andean	2300.48	999.05	0	26.87	12.96	15.16	2	MPA
SDP141	White speckled	2	andean	1395.59	612.98	62.52	19.33	8.61	16.59	2	MPA
SDP143	Pink	1	andean	2936.47	1082.38	33.93	28.72	15.18	13.91	2	MPA
SDP144	Red	1	andean	2224.42	1066.34	193.4	27.73	14.85	17.95	2	MPA
SDP145	Grey	3	andean	2028.73	877.05	0	25.09	11.34	15.04	2	MPA
SDP146	Cream	1	andean	2684.91	1654.42	0	36.26	21.07	21.11	3	HPA
SDP147	Black	1	mesoamerican	2120.53	611.08	300.31	39.84	13	16.5	2	MPA
SDP148	White speckled	2	andean	1444.29	493.09	9.8	17.84	5.33	9.92	1	MPA
SDP149	Black	1	mesoamerican	2389.09	636.44	674.9	42.98	15.75	17.74	2	MPA
SDP151	Black	1	andean	1855.28	677.21	208.4	29.45	15	21.75	2	MPA
SDP152	Pink	1	andean	2868.05	1221.7	0	29.31	15.77	14.8	2	MPA
SDP153	Brown	1	andean	2556.38	1335.48	0	27.04	15.64	16.46	2	MPA
SDP154	Cream	1	andean	2359.67	821.45	0	31.07	14.95	17.04	2	MPA
SDP155	White	1	andean	661.07	137.88	0	6.51	1.34	5.46	1	LPA
SDP156	Brown	1	andean	2268.33	683.37	0	18.96	10.68	12.67	2	MPA
SDP157	Brown	1	andean	3331.04	1781.8	0	39.1	33.32	26.91	3	HPA
SDP160	White	1	mesoamerican	638.15	113.28	0	5.87	1.35	5.67	1	LPA
SDP161	White	1	andean	544.41	74.93	0	4.08	1.13	5.6	1	LPA
SDP162	Brown	1	andean	2314.74	1052.52	0	31.6	15.52	18.04	2	MPA
SDP163	Pink	1	andean	1806.13	861.49	0	20.36	9.11	13.57	2	MPA
SDP164	Brown	1	mesoamerican	2974.56	1297.97	28.05	32.5	17.53	15.86	2	MPA
SDP165	Cream	2	andean	1901.69	618.62	0	27.85	12.72	17.99	2	MPA
SDP166	White	1	admixture	593.79	80.06	0	3.81	1.14	5.18	1	LPA
SDP167	Red	2	admixture	2607.47	1494.67	123.62	34.27	17.99	18.56	2	MPA
SDP168	Grey	3	andean	1519.78	629.68	0	17.65	7.98	14.12	2	MPA
SDP171	Pink	1	mesoamerican	2292.96	715.86	0	28.19	15.25	17.89	2	MPA
SDP172	White	1	mesoamerican	569.96	79.95	0	6	0.78	3.68	1	LPA
SDP173	White speckled	3	andean	1170.03	495.15	47.42	12.1	5.51	12.67	1	LPA
SDP174	Pink	1	andean	2199.33	864.1	0	24.26	13.16	16.09	2	MPA
SDP175	Black	1	andean	3068.99	1760.44	115.42	42.49	23.24	20.38	3	HPA
SDP176	White	1	andean	664.15	115.43	0	6.05	1.07	4.35	1	LPA
SDP177	Cream	2	andean	2416	1025.08	0	35.24	17.03	18.97	2	MPA
SDP178	Cream	2	andean	1869.42	668.99	0	27.99	13.39	19.26	2	MPA
SDP179	Pink	1	andean	2411.21	910.97	0	23.55	13.88	15.49	2	MPA
SDP181	Red	1	andean	3271.52	1305.94	343.11	55.26	26.47	21.76	3	HPA
SDP182	Red	1	andean	2479.52	1202.5	206.62	31.76	13.73	14.9	2	MPA
SDP184	Yellow	1	andean	2868.39	1291.65	0	28.4	16.51	15.48	2	MPA
SDP185	White speckled	2	andean	2069.1	892.74	119.92	26.76	12.63	16.43	2	MPA
SDP186	White speckled	3	andean	862.47	192.76	0	7.83	2.83	8.81	1	LPA
SDP189	Brown	1	admixture	2433.68	1098.7	0	29.25	15.57	17.21	2	MPA
SDP190	White speckled	2	andean	1164.78	486.13	48.63	19.31	6.14	14.17	1	MPA
SDP191	White	1	andean	834.53	139.79	0	13.61	3.54	11.4	1	LPA
SDP192	Cream	2	andean	3195.91	1639.35	14.16	68.36	38.07	32.05	3	HPA
SDP193	White	1	admixture	757.78	97.89	0	7.29	1.76	6.26	1	LPA
SDP194	Red	2	andean	2934.76	1730.66	67.51	42.73	23.88	21.89	3	HPA
SDP197	White	1	admixture	735.88	97.21	0	5.65	1.18	4.31	1	LPA
SDP198	Brown	2	andean	2094.53	699.34	0	28.68	12.24	15.73	2	MPA
SDP199	Cream	1	mesoamerican	1661.3	530.29	32.29	27.03	12.62	20.43	2	MPA
SDP200	White speckled	2	mesoamerican	549.2	112.27	0	5.76	1.08	5.28	1	LPA
SDP201	Black	1	mesoamerican	2848.21	962.64	697.61	51.44	18.87	17.82	3	MPA
SDP203	White	1	mesoamerican	595.39	107.3	0	7.96	0.78	3.54	1	LPA
SDP204	White	1	admixture	715.47	144.65	0	7.54	1.31	4.94	1	LPA
SDP206	Brown	1	admixture	2066.93	914.38	0	37.1	16.36	21.3	2	MPA
SDP207	Cream	2	admixture	2705.2	1315.73	0	49.97	21.97	21.85	3	HPA
SDP208	Brown	2	andean	2461.39	1575.37	18.35	33.12	17.18	18.78	2	MPA
SDP209	White	1	admixture	593.45	90.21	0	5.29	1.02	4.62	1	LPA
SDP210	Brown	1	admixture	2002.96	670.96	0	19.94	10.08	13.54	2	MPA
SDP211	Brown	2	andean	1738.96	775.88	0	21.48	9.96	15.41	2	MPA
SDP212	White	1	mesoamerican	472	110.86	0	6.01	0.94	5.38	1	LPA
SDP213	White	1	mesoamerican	563	132.46	0	6.98	1.22	5.83	1	LPA
SDP214	White	1	admixture	573.95	100.42	0	5.42	1.13	5.28	1	LPA
SDP215	White speckled	3	andean	934.65	387.14	0	10.73	3.48	10	1	LPA
SDP216	Cream	1	admixture	2816.39	1541.61	0	40.6	25.52	24.38	3	HPA
SDP217	White speckled	3	admixture	1030.22	409.36	12.95	13.06	5.26	13.73	1	LPA
SDP219	White	1	mesoamerican	534.72	137.26	0	5.67	1.14	5.76	1	LPA
SDP220	White speckled	2	andean	523.77	137.35	0	5.22	1.13	5.78	1	LPA
SDP221	White	1	andean	349.87	102.91	0	3.68	0.73	5.59	1	LPA
SDP223	Black	1	admixture	2430.83	700.91	592.43	35.84	14.98	16.57	2	MPA
SDP224	Cream	2	andean	1519.55	475.18	0	21.44	9.04	16.01	2	MPA
SDP225	Black	1	mesoamerican	1596.64	525.95	292.65	26.31	12.54	21.13	2	MPA
SDP227	Red	1	mesoamerican	3254.87	1450.48	336.34	34.24	22.65	18.72	3	HPA
SDP228	White	1	admixture	435.17	103.92	0	8.43	0.92	5.69	1	LPA
SDP229	White	1	admixture	806.82	119.55	0	5.6	1.27	4.23	1	LPA
SDP230	White	1	admixture	592.31	103.75	0	5.12	1.33	6.05	1	LPA
SDP231	Black	1	admixture	2667.57	802.97	809.38	43.26	14.89	15.01	2	MPA
SDP232	Red	2	admixture	3702.92	2417.26	12.07	50.85	35.61	25.87	3	HPA
SDP233	Black	1	admixture	2568.47	746.11	273.59	37.92	15.28	16.01	2	MPA
SDP234	White	1	mesoamerican	517.73	96.53	0	5.29	1.25	6.51	1	LPA
SDP236	White	1	mesoamerican	745.58	161.06	0	8.69	1.54	5.55	1	LPA
SDP237	White	1	mesoamerican	723.57	103.81	0	9.53	3.21	11.95	1	LPA
SDP240	Black	1	admixture	2612.83	792.85	520.29	44.05	17.5	18.02	3	MPA
SDP241	Red	1	andean	2499.94	1009.23	12.38	26.1	13.6	14.64	2	MPA
SDP242	Black	1	admixture	1934.88	479.65	372.45	24.66	10.76	14.96	2	MPA
SDP244	White	1	mesoamerican	655.72	99.35	0	6.91	1.27	5.21	1	LPA
SDP245	Cream	1	andean	3092.14	1750.73	0	39.02	32.26	28.07	3	HPA
SDP246	White	1	mesoamerican	516.25	79.89	0	4.93	1.3	6.79	1	LPA
SDP247	White	1	admixture	655.37	123.49	0	5.91	1.11	4.57	1	LPA
SDP251	Black	1	admixture	3010.26	1310.8	457.77	52.08	24	21.44	3	HPA
SDP252	Black	1	andean	2168.88	809.84	242.6	35.34	15.42	19.12	2	MPA
SDP253	Black	1	andean	1848.89	636.86	95.78	27.52	8.95	13.03	2	MPA
SDP254	Cream	2	admixture	2254.07	759.75	0	32.74	14.37	17.15	2	MPA
SDP256	Red	1	andean	1889.04	906.74	0	23.24	11.36	16.18	2	MPA
SDP257	White	1	admixture	606.45	120.17	0	7.01	1.1	4.88	1	LPA
SDP260	Black	1	andean	3126.92	1282.31	151.8	52.12	24.72	21.27	3	HPA
SDP261	White	1	admixture	640.43	117.29	0	6.69	1.06	4.46	1	LPA
SDP262	White	1	mesoamerican	535.06	97.89	0	5.12	1.19	6	1	LPA
SDP266	White	1	admixture	658.79	104.26	0	4.96	1.03	4.2	1	LPA
SDP268	Brown	2	andean	2177.67	1036.22	0	24.68	15.76	19.48	2	MPA
SDP270	White	1	mesoamerican	684.22	101.78	0	5.17	1.13	4.45	1	LPA
SDP271	Black	1	admixture	2665.98	808.71	829.96	44.21	15.29	15.43	2	MPA
SDP273	White	1	admixture	590.6	90.04	0	6.28	0.75	3.43	1	LPA
SDP274	White	1	mesoamerican	522.97	67.71	0	4.3	1	5.12	1	LPA
SDP275	Brown	1	admixture	2149.73	828.88	21.6	19.9	12.61	15.79	2	MPA
SDP277	Black	1	mesoamerican	3356.7	1077.88	893.19	62.52	26.12	20.93	3	HPA
SDP279	Black	1	admixture	2105.94	604.08	249.99	31.04	10.09	12.89	2	MPA
SDP280	Black	1	admixture	2093.28	668.54	170.73	29.13	10.39	13.35	2	MPA
SDP281	Red	1	admixture	2443.94	1041.35	0	45.13	18.84	20.74	3	MPA
SDP282	Black	1	admixture	3334.35	1252.69	613.9	61.5	27.77	22.41	3	HPA
SDP283	Black	1	admixture	2241.53	718.47	510.32	43.13	15.22	18.27	2	MPA
SDP285	Black	1	mesoamerican	3353.62	974.29	449.58	58.09	22.87	18.35	3	HPA
SDP286	Black	1	mesoamerican	2707.03	845.94	679.71	50.42	17.8	17.68	3	MPA
SDP287	White	1	admixture	650.7	138.33	0	6.54	1.26	5.23	1	LPA
SDP288	Black	1	admixture	2114.15	881.55	169.35	37.03	16.51	21.01	2	MPA
SDP290	White	1	mesoamerican	637.58	102.93	0	4.57	1.42	6.01	1	LPA
SDP292	Brown	2	admixture	1936.13	1062.47	0	27.24	12.38	17.2	2	MPA
SDP293	Brown	2	admixture	2331.5	877.21	14.7	38.55	18.88	21.78	2	MPA
SDP294	Black	1	admixture	2577.6	891.58	812.95	46.63	16.23	16.94	3	MPA
SDP298	White	1	andean	540.76	107.02	0	5.44	1.11	5.53	1	LPA
SDP299	Cream	1	andean	3255.32	1378.01	0	34.18	29.99	24.79	3	HPA
SDP300	Brown	2	andean	2043.56	855.79	0	24.9	12.42	16.36	2	MPA
SDP301	White	1	admixture	401.64	93.71	0	4.6	0.83	5.57	1	LPA
SDP302	White speckled	2	andean	1261.6	542.73	46.58	6.71	6.4	13.64	1	LPA
SDP303	White speckled	2	mesoamerican	648.3	90.21	0	6.97	1.27	5.28	1	LPA
SDP304	White	1	mesoamerican	554.68	86.15	0	4.51	1	4.85	1	LPA
SDP305	White	1	mesoamerican	506.55	97.89	0	5.56	1	5.29	1	LPA
SDP306	White	1	admixture	547.95	119.32	0	5.95	1.21	5.94	1	LPA
SDP307	White	1	admixture	567.34	79.33	0	4.43	0.99	4.68	1	LPA
SDP308	White	1	admixture	624.35	88.86	0	4.67	0.96	4.12	1	LPA
